# Supplementary material for: Ammonia monooxygenase: a work in progress
Source: Royal Society of Chemistry journal article supplement (doi:10.1039/d6sc01048b), 2026-04-08
Supplement: d6sc01048b1.pdf [file d6sc01048b1.pdf]

SI Table 1 Substrates of AMO.xlsx

This file cannot be rendered in this PDF. Please download the source file.

SI Table 2 Inhibitors of AMO.xlsx

This file cannot be rendered in this PDF. Please download the source file.

SI Table 3 Ammonia Affinity of Various AOA and AOB.xlsx  
This file cannot be rendered in this PDF. Please download the source file.

ELSEVIER LICENSE  
TERMS AND CONDITIONS

Feb 05, 2026

---

---

This Agreement between Kyle M Lancaster ("You") and Elsevier ("Elsevier") consists of your license details and the terms and conditions provided by Elsevier and Copyright Clearance Center.

|                              |                                                                                     |
|------------------------------|-------------------------------------------------------------------------------------|
| License Number               | 6202650223044                                                                       |
| License date                 | Feb 05, 2026                                                                        |
| Licensed Content Publisher   | Elsevier                                                                            |
| Licensed Content Publication | Joule                                                                               |
| Licensed Content Title       | Alternative Bioenergy: Updates to and Challenges in Nitrification Metalloenzymology |
| Licensed Content Author      | Kyle M. Lancaster,Jonathan D. Caranto,Sean H. Majer,Meghan A. Smith                 |
| Licensed Content Date        | Mar 21, 2018                                                                        |
| Licensed Content Volume      | 2                                                                                   |
| Licensed Content Issue       | 3                                                                                   |
| Licensed Content Pages       | 21                                                                                  |
| Start Page                   | 421                                                                                 |
| End Page                     | 441                                                                                 |

|                                                               |                                                            |
|---------------------------------------------------------------|------------------------------------------------------------|
| Type of Use                                                   | reuse in a journal/magazine                                |
| Requestor type                                                | academic/educational institute                             |
| Portion                                                       | figures/tables/illustrations                               |
| Number of figures/tables/illustrations                        | 1                                                          |
| Format                                                        | both print and electronic                                  |
| Are you the author of this Elsevier article?                  | Yes                                                        |
| Will you be translating?                                      | No                                                         |
| Title of new article                                          | Ammonia Monooxygenase: A Work in Progress                  |
| Lead author                                                   | Thomas C. Arndt                                            |
| Title of targeted journal                                     | Chemical Science                                           |
| Publisher                                                     | Royal Society of Chemistry                                 |
| Expected publication date                                     | Mar 2026                                                   |
| Portions                                                      | Figure 3                                                   |
| The Requesting Person / Organization to Appear on the License | Kyle M Lancaster<br><br>Kyle Lancaster<br>Baker Laboratory |
| Requestor Location                                            | Ithaca, NY 14853<br>United States                          |

Publisher Tax ID

98-0397604

Total

0.00 USD

Terms and Conditions

## INTRODUCTION

1. The publisher for this copyrighted material is Elsevier. By clicking "accept" in connection with completing this licensing transaction, you agree that the following terms and conditions apply to this transaction (along with the Billing and Payment terms and conditions established by Copyright Clearance Center, Inc. ("CCC"), at the time that you opened your RightsLink account and that are available at any time at <https://myaccount.copyright.com>).

## GENERAL TERMS

2. Elsevier hereby grants you permission to reproduce the aforementioned material subject to the terms and conditions indicated.

3. Acknowledgement: If any part of the material to be used (for example, figures) has appeared in our publication with credit or acknowledgement to another source, permission must also be sought from that source. If such permission is not obtained then that material may not be included in your publication/copies. Suitable acknowledgement to the source must be made, either as a footnote or in a reference list at the end of your publication, as follows:

"Reprinted from Publication title, Vol /edition number, Author(s), Title of article / title of chapter, Pages No., Copyright (Year), with permission from Elsevier [OR APPLICABLE SOCIETY COPYRIGHT OWNER]." Also Lancet special credit - "Reprinted from The Lancet, Vol. number, Author(s), Title of article, Pages No., Copyright (Year), with permission from Elsevier."

4. Reproduction of this material is confined to the purpose and/or media for which permission is hereby given. The material may not be reproduced or used in any other way, including use in combination with an artificial intelligence tool (including to train an algorithm, test, process, analyse, generate output and/or develop any form of artificial intelligence tool), or to create any derivative work and/or service (including resulting from the use of artificial intelligence tools).

5. Altering/Modifying Material: Not Permitted. However figures and illustrations may be altered/adapted minimally to serve your work. Any other abbreviations, additions, deletions and/or any other alterations shall be made only with prior written authorization of Elsevier Ltd. (Please contact Elsevier's permissions helpdesk [here](#)). No modifications can be made to any Lancet figures/tables and they must be reproduced in full.

6. If the permission fee for the requested use of our material is waived in this instance, please be advised that your future requests for Elsevier materials may attract a fee.

7. Reservation of Rights: Publisher reserves all rights not specifically granted in the combination of (i) the license details provided by you and accepted in the course of this

licensing transaction, (ii) these terms and conditions and (iii) CCC's Billing and Payment terms and conditions.

8. License Contingent Upon Payment: While you may exercise the rights licensed immediately upon issuance of the license at the end of the licensing process for the transaction, provided that you have disclosed complete and accurate details of your proposed use, no license is finally effective unless and until full payment is received from you (either by publisher or by CCC) as provided in CCC's Billing and Payment terms and conditions. If full payment is not received on a timely basis, then any license preliminarily granted shall be deemed automatically revoked and shall be void as if never granted. Further, in the event that you breach any of these terms and conditions or any of CCC's Billing and Payment terms and conditions, the license is automatically revoked and shall be void as if never granted. Use of materials as described in a revoked license, as well as any use of the materials beyond the scope of an unrevoked license, may constitute copyright infringement and publisher reserves the right to take any and all action to protect its copyright in the materials.

9. Warranties: Publisher makes no representations or warranties with respect to the licensed material.

10. Indemnity: You hereby indemnify and agree to hold harmless publisher and CCC, and their respective officers, directors, employees and agents, from and against any and all claims arising out of your use of the licensed material other than as specifically authorized pursuant to this license.

11. No Transfer of License: This license is personal to you and may not be sublicensed, assigned, or transferred by you to any other person without publisher's written permission.

12. No Amendment Except in Writing: This license may not be amended except in a writing signed by both parties (or, in the case of publisher, by CCC on publisher's behalf).

13. Objection to Contrary Terms: Publisher hereby objects to any terms contained in any purchase order, acknowledgment, check endorsement or other writing prepared by you, which terms are inconsistent with these terms and conditions or CCC's Billing and Payment terms and conditions. These terms and conditions, together with CCC's Billing and Payment terms and conditions (which are incorporated herein), comprise the entire agreement between you and publisher (and CCC) concerning this licensing transaction. In the event of any conflict between your obligations established by these terms and conditions and those established by CCC's Billing and Payment terms and conditions, these terms and conditions shall control.

14. Revocation: Elsevier or Copyright Clearance Center may deny the permissions described in this License at their sole discretion, for any reason or no reason, with a full refund payable to you. Notice of such denial will be made using the contact information provided by you. Failure to receive such notice will not alter or invalidate the denial. In no event will Elsevier or Copyright Clearance Center be responsible or liable for any costs, expenses or damage incurred by you as a result of a denial of your permission request, other than a refund of the amount(s) paid by you to Elsevier and/or Copyright Clearance Center for denied permissions.

### **LIMITED LICENSE**

The following terms and conditions apply only to specific license types:

15. **Translation:** This permission is granted for non-exclusive world **English** rights only unless your license was granted for translation rights. If you licensed translation rights you may only translate this content into the languages you requested. A professional translator must perform all translations and reproduce the content word for word preserving the integrity of the article.

16. **Posting licensed content on any Website:** The following terms and conditions apply as follows: Licensing material from an Elsevier journal: All content posted to the web site must maintain the copyright information line on the bottom of each image; A hyper-text must be included to the Homepage of the journal from which you are licensing at <http://www.sciencedirect.com/science/journal/xxxxx> or the Elsevier homepage for books at <http://www.elsevier.com>; Central Storage: This license does not include permission for a scanned version of the material to be stored in a central repository such as that provided by Heron/XanEdu.

Licensing material from an Elsevier book: A hyper-text link must be included to the Elsevier homepage at <http://www.elsevier.com> . All content posted to the web site must maintain the copyright information line on the bottom of each image.

**Posting licensed content on Electronic reserve:** In addition to the above the following clauses are applicable: The web site must be password-protected and made available only to bona fide students registered on a relevant course. This permission is granted for 1 year only. You may obtain a new license for future website posting.

17. **For journal authors:** the following clauses are applicable in addition to the above:

#### **Preprints:**

A preprint is an author's own write-up of research results and analysis, it has not been peer-reviewed, nor has it had any other value added to it by a publisher (such as formatting, copyright, technical enhancement etc.).

Authors can share their preprints anywhere at any time. Preprints should not be added to or enhanced in any way in order to appear more like, or to substitute for, the final versions of articles however authors can update their preprints on arXiv or RePEc with their Accepted Author Manuscript (see below).

If accepted for publication, we encourage authors to link from the preprint to their formal publication via its DOI. Millions of researchers have access to the formal publications on ScienceDirect, and so links will help users to find, access, cite and use the best available version. Please note that Cell Press, The Lancet and some society-owned have different preprint policies. Information on these policies is available on the journal homepage.

**Accepted Author Manuscripts:** An accepted author manuscript is the manuscript of an article that has been accepted for publication and which typically includes author-incorporated changes suggested during submission, peer review and editor-author communications.

Authors can share their accepted author manuscript:

- immediately
  - via their non-commercial person homepage or blog
  - by updating a preprint in arXiv or RePEc with the accepted manuscript

- via their research institute or institutional repository for internal institutional uses or as part of an invitation-only research collaboration work-group
- directly by providing copies to their students or to research collaborators for their personal use
- for private scholarly sharing as part of an invitation-only work group on commercial sites with which Elsevier has an agreement
- After the embargo period
  - via non-commercial hosting platforms such as their institutional repository
  - via commercial sites with which Elsevier has an agreement

In all cases accepted manuscripts should:

- link to the formal publication via its DOI
- bear a CC-BY-NC-ND license - this is easy to do
- if aggregated with other manuscripts, for example in a repository or other site, be shared in alignment with our hosting policy not be added to or enhanced in any way to appear more like, or to substitute for, the published journal article.

**Published journal article (JPA):** A published journal article (PJA) is the definitive final record of published research that appears or will appear in the journal and embodies all value-adding publishing activities including peer review co-ordination, copy-editing, formatting, (if relevant) pagination and online enrichment.

Policies for sharing publishing journal articles differ for subscription and gold open access articles:

**Subscription Articles:** If you are an author, please share a link to your article rather than the full-text. Millions of researchers have access to the formal publications on ScienceDirect, and so links will help your users to find, access, cite, and use the best available version.

Theses and dissertations which contain embedded PJAs as part of the formal submission can be posted publicly by the awarding institution with DOI links back to the formal publications on ScienceDirect.

If you are affiliated with a library that subscribes to ScienceDirect you have additional private sharing rights for others' research accessed under that agreement. This includes use for classroom teaching and internal training at the institution (including use in course packs and courseware programs), and inclusion of the article for grant funding purposes.

**Gold Open Access Articles:** May be shared according to the author-selected end-user license and should contain a [CrossMark logo](#), the end user license, and a DOI link to the formal publication on ScienceDirect.

Please refer to Elsevier's [posting policy](#) for further information.

**18. For book authors** the following clauses are applicable in addition to the above: Authors are permitted to place a brief summary of their work online only. You are not allowed to download and post the published electronic version of your chapter, nor may you scan the printed edition to create an electronic version. **Posting to a repository:** Authors are permitted to post a summary of their chapter only in their institution's repository.

**19. Thesis/Dissertation:** If your license is for use in a thesis/dissertation your thesis may be submitted to your institution in either print or electronic form. Should your thesis be

published commercially, please reapply for permission. These requirements include permission for the Library and Archives of Canada to supply single copies, on demand, of the complete thesis and include permission for Proquest/UMI to supply single copies, on demand, of the complete thesis. Should your thesis be published commercially, please reapply for permission. Theses and dissertations which contain embedded PJAs as part of the formal submission can be posted publicly by the awarding institution with DOI links back to the formal publications on ScienceDirect.

### **Elsevier Open Access Terms and Conditions**

You can publish open access with Elsevier in hundreds of open access journals or in nearly 2000 established subscription journals that support open access publishing. Permitted third party re-use of these open access articles is defined by the author's choice of Creative Commons user license. See our [open access license policy](#) for more information.

#### **Terms & Conditions applicable to all Open Access articles published with Elsevier:**

Any reuse of the article must not represent the author as endorsing the adaptation of the article nor should the article be modified in such a way as to damage the author's honour or reputation. If any changes have been made, such changes must be clearly indicated.

The author(s) must be appropriately credited and we ask that you include the end user license and a DOI link to the formal publication on ScienceDirect.

If any part of the material to be used (for example, figures) has appeared in our publication with credit or acknowledgement to another source it is the responsibility of the user to ensure their reuse complies with the terms and conditions determined by the rights holder.

#### **Additional Terms & Conditions applicable to each Creative Commons user license:**

**CC BY:** The CC-BY license allows users to copy, to create extracts, abstracts and new works from the Article, to alter and revise the Article and to make commercial use of the Article (including reuse and/or resale of the Article by commercial entities), provided the user gives appropriate credit (with a link to the formal publication through the relevant DOI), provides a link to the license, indicates if changes were made and the licensor is not represented as endorsing the use made of the work. The full details of the license are available at <http://creativecommons.org/licenses/by/4.0>.

**CC BY NC SA:** The CC BY-NC-SA license allows users to copy, to create extracts, abstracts and new works from the Article, to alter and revise the Article, provided this is not done for commercial purposes, and that the user gives appropriate credit (with a link to the formal publication through the relevant DOI), provides a link to the license, indicates if changes were made and the licensor is not represented as endorsing the use made of the work. Further, any new works must be made available on the same conditions. The full details of the license are available at <http://creativecommons.org/licenses/by-nc-sa/4.0>.

**CC BY NC ND:** The CC BY-NC-ND license allows users to copy and distribute the Article, provided this is not done for commercial purposes and further does not permit distribution of the Article if it is changed or edited in any way, and provided the user gives appropriate credit (with a link to the formal publication through the relevant DOI),

provides a link to the license, and that the licensor is not represented as endorsing the use made of the work. The full details of the license are available at <http://creativecommons.org/licenses/by-nc-nd/4.0>. Any commercial reuse of Open Access articles published with a CC BY NC SA or CC BY NC ND license requires permission from Elsevier and will be subject to a fee.

Commercial reuse includes:

- Associating advertising with the full text of the Article
- Charging fees for document delivery or access
- Article aggregation
- Systematic distribution via e-mail lists or share buttons

Posting or linking by commercial companies for use by customers of those companies.

**20. Other Conditions:**

v1.11

**Questions? [customercare@copyright.com](mailto:customercare@copyright.com).**

---

---

THE AMERICAN ASSOCIATION FOR THE ADVANCEMENT OF SCIENCE  
LICENSE  
TERMS AND CONDITIONS

Feb 05, 2026

---

---

This Agreement between Kyle M Lancaster ("You") and The American Association for the Advancement of Science ("The American Association for the Advancement of Science") consists of your license details and the terms and conditions provided by The American Association for the Advancement of Science and Copyright Clearance Center.

**All payments must be made in full to CCC. For payment instructions, please see information listed at the bottom of this form.**

|                              |                                                                            |
|------------------------------|----------------------------------------------------------------------------|
| License Number               | 6202650103796                                                              |
| License date                 | Feb 05, 2026                                                               |
| Licensed Content Publisher   | The American Association for the Advancement of Science                    |
| Licensed Content Publication | Science                                                                    |
| Licensed Content Title       | Particulate methane monooxygenase contains only mononuclear copper centers |
| Licensed Content Author      | Matthew O. Ross, Fraser MacMillan, Jingzhou Wang, Alex Nisthal, et al.     |
| Licensed Content Date        | May 10, 2019                                                               |
| Licensed Content Volume      | 364                                                                        |
| Licensed Content Issue       | 6440                                                                       |
| Volume number                | 364                                                                        |

|                                                               |                                           |
|---------------------------------------------------------------|-------------------------------------------|
| Issue number                                                  | 6440                                      |
| Type of Use                                                   | Journal                                   |
| Requestor type                                                | Academic/Non-Commercial                   |
| Format                                                        | Print and Electronic                      |
| Portion                                                       | Figure                                    |
| Number of figures/tables                                      | 1                                         |
| Title of new article                                          | Ammonia Monooxygenase: A Work in Progress |
| Lead author                                                   | Thomas C. Arndt                           |
| Title of targeted journal                                     | Chemical Science                          |
| Publisher                                                     | Royal Society of Chemistry                |
| Expected publication date                                     | Mar 2026                                  |
| Portions                                                      | S8                                        |
| The Requesting Person / Organization to Appear on the License | Kyle M Lancaster                          |
|                                                               | Kyle Lancaster<br>Baker Laboratory        |
| Requestor Location                                            | Ithaca, NY 14853<br>United States         |
| Payment Type                                                  | Credit Card                               |
| Credit card info                                              | Visa ending in 2243                       |

Credit card expiration 01/2029

Email Address kml236@cornell.edu

Kyle Lancaster  
901 Paloma Place

Billing Address

FULLERTON, CA 92835  
United States

Total 31.25 USD

#### Terms and Conditions

#### American Association for the Advancement of Science ("AAAS") TERMS AND CONDITIONS

Regarding your request, we are pleased to grant you non-exclusive, non-transferable permission, to republish the AAAS material subject to the terms and conditions herein. We must be contacted for permission for any uses other than those specifically identified in your request.

Credit/Copyright notice must be provided according to current industry standards and should include "Reproduced/modified from [Lead Author] et al., Science Journal Title, DOI number [Year], AAAS."

All required credit lines and notices must be visible any time a user accesses any part of the AAAS material and must appear on any printed copies an authorized user might make.

This permission does not apply to articles/text/figures/photos/artwork or any other content or materials included in your work that are credited to non-AAAS sources. You are responsible for ensuring that the material you wish to use is not controlled by another entity or third-party. If the requested material is sourced to or references non-AAAS sources, you are responsible for obtaining authorization from that other entity or third-party source before using that material. You agree to hold harmless and indemnify AAAS against any claims arising from your use of any content in your work that credits non-AAAS sources.

If the AAAS material covered by this permission was published in Science during the years 1974 - 1994, you must also obtain permission from the author, who may grant or withhold permission, and who may or may not charge a fee if permission is granted. See original article for author's address. This condition does not apply to news articles.

Modifications and adaptations to the AAAS material require permission from the AAAS journal article author. Author permission for any such changes must be secured prior to your use. Minor edits to charts, graphs, figures or tables that do not alter the meaning, purpose, or context of the AAAS material and that are made, for example to fit to house style, do not require permission from the AAAS journal article author.

Whenever possible, we ask that electronic uses of the AAAS material permitted herein include a hyperlink to the original work on AAAS's website (hyperlink may be embedded in the reference citation).

AAAS material reproduced in your work identified herein must not account for more than 30% of the total contents of that work.

Your use of AAAS material must not imply any endorsement by the American Association for the Advancement of Science.

This permission is not valid for the use of AAAS and/or AAAS journal logos.

AAAS makes no representations or warranties as to the accuracy of any information contained in the AAAS material covered by this permission, including any warranties of merchantability or fitness for a particular purpose.

If permission fees for this use are waived, please note that AAAS reserves the right to charge for reproduction of this material in the future.

Permission is not valid unless payment is received within sixty (60) days of the issuance of this permission. If payment is not received within this time period then all rights granted herein shall be revoked and this permission will be considered null and void.

In the event of breach of any of the terms and conditions herein or any of CCC's Billing and Payment terms and conditions, all rights granted herein shall be revoked and this permission will be considered null and void.

AAAS reserves the right to terminate this permission and all rights granted herein at its discretion, for any purpose, at any time. In the event that AAAS elects to terminate this permission, you will have no further right to publish, publicly perform, publicly display, distribute or otherwise use any matter in which the AAAS material had been included, and all fees paid hereunder shall be fully refunded to you. Notification of termination will be sent to the contact information as supplied by you during the request process and termination shall be immediate upon sending the notice. Neither AAAS nor CCC shall be liable for any costs, expenses, or damages you may incur as a result of the termination of this permission, beyond the refund noted above.

This Permission may not be amended except by written document signed by both parties.

The terms above are applicable to all permissions granted for the use of AAAS material. Below you will find additional conditions that apply to your particular type of use.

#### **FOR A THESIS OR DISSERTATION**

If you are using figure(s)/table(s), permission is granted for use in print and electronic versions of your dissertation or thesis. A full text article may be used in print versions only of a dissertation or thesis.

Permission covers the distribution of your dissertation or thesis on demand by ProQuest provided the AAAS material covered by this permission remains in situ.

If you are an original author on the AAAS material being reproduced, please refer to your License to Publish for rules on reproducing your paper in a dissertation or thesis.

#### **FOR JOURNALS/MAGAZINES:**

Permission for use of figures/tables in a journal/magazine includes world-wide rights for

use in both print and electronic versions of your journal/magazine. The AAAS material may not be used in any manner other than within the context of your article.

### **FOR BOOKS/TEXTBOOKS:**

Permission for use of figures/tables, in a book/textbook includes world-wide rights in all languages for both print and electronic formats (electronic formats are defined below).

Permission for use of a text excerpt or a full text article includes world-wide rights in English only. You have the option of securing either print or electronic rights or both, but electronic rights are not automatically granted and are subject to additional fees.

Permission for translations of text excerpts or full text articles into other languages must be obtained separately.

Permission for use of AAAS material in electronic format books/textbooks is granted only in cases where the electronic version is equivalent to or substitutes for the print version of the book/textbook. The AAAS material reproduced as permitted herein must remain in situ and must not be exploited separately (for example, if permission covers the use of a full text article, the article may not be offered for access or for purchase as a stand-alone unit), except in the case of permitted textbook companions as noted below.

You must include the following notice in any electronic versions, either adjacent to the reproduced AAAS material or in the terms and conditions for use of your electronic products: "Readers may view, browse, and/or download material for temporary copying purposes only, provided these uses are for non-commercial personal purposes. Except as provided by law, this material may not be further reproduced, distributed, transmitted, modified, adapted, performed, displayed, published, or sold in whole or in part, without prior written permission from the publisher."

If your book is an academic textbook, permission covers the following companions to your textbook, provided such companions are distributed only in conjunction with your textbook at no additional cost to the user:

- Password-protected website
- Instructor guides
- Testing materials
- Student resources

All companions must contain instructions to users that the AAAS material may be used for non-commercial, classroom purposes only. Any other uses require the prior written permission from AAAS.

If your license is for the use of AAAS figures/tables, then the electronic rights granted herein permit use of the AAAS material in any custom databases that you distribute the electronic versions of your textbook through, so long as the AAAS material remains within the context of a chapter of the title identified in your request and cannot be downloaded by a user as an independent image file.

Rights also extend to copies/files of your work that you are required to provide for use by the visually and/or print disabled in compliance with state and federal laws.

This permission only covers a single edition of your work as identified in your request.

### **FOR NEWSLETTERS:**

Permission covers print and/or electronic versions of your Newsletter, provided the AAAS

material reproduced remains in situ and is not exploited separately from your Newsletter issue (for example, if permission covers the use of a full text article, the article may not be offered for access or for purchase as a stand-alone unit)

#### **FOR ANNUAL REPORTS:**

Permission covers print and electronic versions of your Annual Report provided the AAAS material reproduced remains in situ and is not exploited separately from your Annual Report (for example, if permission covers the use of a full text article, the article may not be offered for access or for purchase as a stand-alone unit).

#### **FOR PROMOTIONAL/MARKETING USES:**

Permission covers the use of AAAS material in promotional or marketing pieces such as information packets, media kits, product slide kits, brochures, or flyers limited to a single print run. The AAAS material may not be used in any manner which implies endorsement or promotion by the American Association for the Advancement of Science (AAAS) or of any AAAS journal any product or service. AAAS does not permit the reproduction of its name, logo or text on promotional literature.

If permission to use a full text article is permitted, the AAAS journal article covered by this permission must not be altered in any way. No additional printing may be set onto an article copy other than the copyright credit line required above. Any alterations must be approved in advance and in writing by AAAS. This includes, but is not limited to, the placement of sponsorship identifiers, trademarks, logos, rubber stamping or self-adhesive stickers onto article copies.

Additionally, article copies must be a freestanding part of any information package (i.e. media kit) into which they are inserted. They may not be physically attached to anything, such as an advertising insert, or have anything attached to them, such as a sample product. Article copies must be easily removable from any kits or informational packages in which they are used. The only exception is that article copies may be inserted into three-ring binders.

If you are using AAAS material in presentation slides, the required credit line must be visible on the slide where the AAAS material is reproduced.

#### **FOR CORPORATE INTERNAL USE:**

The AAAS material covered by this permission may not be altered in any way. No additional printing may be set onto an article copy other than the required credit line. Any alterations must be approved in advance and in writing by AAAS. This includes but is not limited to the placement of sponsorship identifiers, trademarks, logos, rubber stamping or self-adhesive stickers onto article copies.

If you are making article copies, copies are restricted to the number indicated in your request and must be distributed only to internal employees for internal use.

If you are using AAAS material in presentation slides, the required credit line must be visible on the slide where the AAAS material is reproduced.

If you are using AAAS material in an electronic or digital format, you must include the following notice in any such versions, either adjacent to the reprinted AAAS material or in the terms and conditions for use of your electronic products: "Readers may view, browse, and/or download material for temporary copying purposes only, provided these uses are for non-commercial personal purposes. Except as provided by law, this material may not be further reproduced, distributed, transmitted, modified, adapted, performed, displayed, published, or sold in whole or in part, without prior written permission from the

publisher." Access to any such electronic or digital products must be restricted to your organization's employees only.

#### **FOR CME COURSE and SCIENTIFIC SOCIETY MEETINGS:**

Permission is restricted to the particular Course, Seminar, Conference, or Meeting indicated in your request. If this license covers a text excerpt or a full text article, access to the reproduced AAAS material must be restricted to attendees of your event only (if you have been granted electronic rights for use of a full text article on your website, your website must be password protected, or access restricted so that only attendees can access the AAAS material on your site).

If you are using AAAS material in an electronic or digital format, you must include the following notice in any such versions, either adjacent to the reproduced AAAS material or in the terms and conditions for use of your electronic products: "Readers may view, browse, and/or download material for temporary copying purposes only, provided these uses are for non-commercial personal purposes. Except as provided by law, this material may not be further reproduced, distributed, transmitted, modified, adapted, performed, displayed, published, or sold in whole or in part, without prior written permission from the publisher."

#### **FOR POLICY REPORTS:**

These rights are granted only to non-profit organizations and/or government agencies. Permission covers print and electronic versions of a report, provided the required credit line appears in both versions and provided the AAAS material reproduced as permitted herein remains in situ and is not exploited separately.

#### **FOR CLASSROOM PHOTOCOPIES:**

Permission covers distribution in print copy format only. Article copies must be freestanding and not part of a course pack. They may not be physically attached to anything or have anything attached to them.

#### **FOR COURSEPACKS OR COURSE WEBSITES:**

These rights cover use of the AAAS material in one class at one institution. Permission is valid only for a single semester after which the AAAS material must be removed from the Electronic Course website, unless new permission is obtained for an additional semester. If the material is to be distributed online, access must be restricted to students and instructors enrolled in that particular course by some means of password or access control.

#### **FOR WEBSITES:**

You must include the following notice in any electronic versions, either adjacent to the reprinted AAAS material or in the terms and conditions for use of your electronic products: "Readers may view, browse, and/or download material for temporary copying purposes only, provided these uses are for non-commercial personal purposes. Except as provided by law, this material may not be further reproduced, distributed, transmitted, modified, adapted, performed, displayed, published, or sold in whole or in part, without prior written permission from the publisher."

Permissions for the use of full text articles on third party websites are granted on a case by case basis and only in cases where access to the AAAS material is restricted by some means of password or access control. Alternately, an E-Print may be purchased through our reprints department ([amy.schrivier@sheridan.com](mailto:amy.schrivier@sheridan.com)).

REGARDING FULL TEXT ARTICLE USE ON THE WORLD WIDE WEB IF YOU ARE AN AUTHOR OF A PAPER PUBLISHED BY AAAS IN A SCIENCE FAMILY JOURNAL

If you chose "Author of the AAAS published paper" as the Requestor Type, you are warranting that you are one of the authors listed on the published version of the AAAS material you are obtaining permission to use.

Authors of the AAAS published paper may post the 'Accepted Version' of their full text article on their personal or on their University website and not on any other website. The 'Accepted Version' is the version of the paper accepted for publication by AAAS including changes resulting from peer review but prior to AAAS's copy editing and production (in other words not the AAAS published version).

**FOR MOVIES / FILM / TELEVISION:**

Permission is granted to use, record, film, photograph, and/or tape the AAAS material in connection with your program/film and in any medium your program/film may be shown or heard, including but not limited to broadcast and cable television, radio, print, and world wide web.

The required credit line should run in the program/film's end credits.

**FOR MUSEUM EXHIBITIONS:**

Permission is granted to use the AAAS material as part of a single exhibition for the duration of that exhibit. Permission for use of the AAAS material in promotional materials for the exhibit must be cleared separately with AAAS (please contact us at [permissions@aaas.org](mailto:permissions@aaas.org)).

**FOR TRANSLATIONS:**

Translation rights apply only to the language identified in your request summary above.

The following disclaimer must appear with your translation, on the first page of the article, after the credit line: "This translation is not an official translation by AAAS staff, nor is it endorsed by AAAS as accurate. In crucial matters, please refer to the official English-language version originally published by AAAS."

**FOR USE ON A COVER:**

Permission is granted to use the AAAS material on the cover of a journal issue, newsletter issue, book, textbook, or annual report in print and electronic formats provided the AAAS material reproduced as permitted herein remains in situ and is not exploited separately

By using the AAAS material identified in your request, you agree to abide by all the terms and conditions herein.

Questions about these terms can be directed to the AAAS Permissions department [permissions@aaas.org](mailto:permissions@aaas.org).

Other Terms and Conditions:

v 2.1

Questions? [customercare@copyright.com](mailto:customercare@copyright.com).

---

---
