# Supplementary material for: Ammonia monooxygenase: a work in progress
Source: Royal Society of Chemistry journal article supplement (doi:10.1039/d6sc01048b), 2026-04-08
Supplement: d6sc01048b2.xlsx [file d6sc01048b2.xlsx]

## Sheet: Substrates
	Organism	AMO Source	Substrate	Product	pH	Temp (°C)	KM	KI	Vmax	kcat/KM (rel. to NH3)	Notes	Reference
	N. europaea	Whole cell assay	NH3	Hydroxylamine	7.75	30	50 μM					Hyman, Wood. 1983.
			NH4+	Hydroxylamine	7.75	30	1.2 mM
			CH4	Methanol	7.75	30		2 mM
	N. europaea	Whole cell assay	Ethylene	Ethylene Oxide	7.7	30				0.04		Hyman, Wood. 1984.
	N. europaea	Whole cell assay	Benzene	Phenol	7.7	30				0.4		Hyman, Wood. 1985
			Phenol	Hydroquinone	7.7	30					Only observe para-product
	N. europaea	Whole cell assay	CH4	Methanol	7.7	30				0.004		Vosey, Wood. 1986
			Methanol	Formaldehyde	7.7	30				0.008
			Formaldehyde	Formaldoxime	7.7	30					0.1 mM formaldehyde killed cells
	N. europaea	Whole cell assay	CH4	Methanol	7.7	30						Hyman, Arp. 1988
			Ethane	Ethanol	7.7	30
			Propane	Propan-1-ol	7.7	30
				Propan-2-ol	7.7	30
			Butane	Butan-1-ol	7.7	30
				Butan-2-ol	7.7	30
			Pentane	Pentan-1-ol	7.7	30
				Pentan-2-ol	7.7	30
			Hexane	Hexan-1-ol	7.7	30
				Hexan-2-ol	7.7	30
			Heptane	Heptan-1-ol	7.7	30
				Heptan-2-ol	7.7	30
			Octane	Octan-1-ol	7.7	30
				Octan-2-ol	7.7	30
			Ethylene	Ethylene Oxide	7.7	30
			Propylene	Propylene Oxide	7.7	30
				2-Propene-1-ol	7.7	30
			1-Butene	1,2-Epoxybutane	7.7	30
				3-Butene-1-ol	7.7	30
				3-Butene-2-ol	7.7	30
			1-Pentene	1,2-Epoxyoentane	7.7	30
				4-Pentene-1-ol	7.7	30
				4-Pentene-2-ol	7.7	30
			cis-2-Butene	cis-2,3-Epoxybutane	7.7	30
				cis-2-Butene-1-ol	7.7	30
			trans-2-Butene	trans-2,3-Epoxybutane	7.7	30
				trans-2-Butene-1-ol	7.7	30
	N. europaea	Whole cell assay	Trichloroethylene		7.5	20					No products obs	Arciero, Hooper. 1989
	N. europaea	Whole cell assay	Fluoroethane	Acetaldehyde	7.7	25						Rasche, Arp. 1990.
			Chloromethane	Formaldehyde	7.7	25
			Chloroethane	Acetaldehyde (99%)	7.7	25
				2-Chloroethanol (<1%)	7.7	25
			Chloropropane	Propionaldehyde (10%)	7.7	25
				3-Chloro-1-propanol (60%)	7.7	25
				1-Chloro-2-propanol (30%)	7.7	25
			Chlorobutane	Butyraldehyde (20%)	7.7	25
				4-Chloro-1-butanol (80%)	7.7	25
			Bromoethane	Acetaldehyde	7.7	0
			Iodoethane	Acetaldehyde	7.7	25
	N. europaea	Whole cell assay	Dichloromethane								No Conditions listed.	Vannelli, Hooper. 1990.
			Dibromomethane								No Conditions listed.
			Trichloromethane								No Conditions listed.
			Tetrachloromethane	No rxn							No Conditions listed.
			Bromoethane								No Conditions listed.
			1,2-Dibromoethane								No Conditions listed.
			1,1,2-Trichloroethane								No Conditions listed.
			1,1,1-Trichloroethane								No Conditions listed.
			Chloroethylene								No Conditions listed.
			gem-Dichloroethylene								No Conditions listed.
			cis-Dichloroethylene								No Conditions listed.
			trans-Dichloroethylene								No Conditions listed.
			cis-Dibromoethylene								No Conditions listed.
			trans-Dibromoethylene	No rxn							No Conditions listed.
			Trichloroethylene								No Conditions listed.
			Tetrachloroethylene	No rxn							No Conditions listed.
			1,2,3-Trichloropropane								No Conditions listed.
	N. europaea	Whole cell assay	Dimethylsulfide	DMSO	8	30						Juliette, Arp. 1993
			Diethylsulfide	No rxn	8	30
			Tetrahydrothiophene	Tetrahydrothiophene Oxide	8	30
			Thiophene	No rxn	8	30
			Methylphenylsulfide	Methylphenylsulfoxide	8	30
			Allylmethylsulfide	Allyl-S(O)CH3	8	30
			Diallylsulfide	No rxn	8	30
	N. europaea	Whole cell assay	NH4+	Hydroxylamine	7.7	30	1.32 + 0.22 mM		1.68 + 0.15 μmol min-1 mg protein-1			Keener, Arp. 1993
			Ethylene	Ethylene Oxide	7.7	30	658 + 154 μM		1.56 + 0.23 μmol min-1 mg protein-1
			Ethane	Ethanol	7.7	30	522 + 27 μM		1.44 + 0.08 μmol min-1 mg protein-1
	N. europaea	Whole cell assay	Benzene	Phenol	7.7						All aromatics inhibit ammonia oxidation	Keener, Arp. 1994
			Phenol	Hydroquinone	7.7
			Toluene	Benzyl Alcohol	7.7
				Benzaldehyde	7.7
			Ethylbenzene	Acetophenone	7.7
				sec-Phenyethyl Alcohol	7.7
				Phenylethyl Alcohol	7.7
				4-Ethyl Phenol	7.7
				Styrene Oxide	7.7
			p-Xylene	4-Methylbenzyl Alcohol	7.7
				p-Tolualdehyde	7.7
				1,4-Benzenedimethanol	7.7
			Styrene	Styrene Oxide	7.7
				Phenylglyoxal	7.7
				2-Hydroxyacetophenone	7.7
			Chlorobenzene	3-Chlorophenol (7%)	7.7
				4-Chlorophenol	7.7
			Bromobenzene	3-Bromophenol (4%)	7.7
				4-Bromophenol	7.7
			Iodobenzene	4-Iodophenol	7.7
			1,4-Dichlorobenzene	No rxn	7.7
			1,2-Dichlorobenzene	3,4-Dichlorophenol	7.7
			Aniline	Nitrobenzene	7.7
			Nitrobenzene	3-Nitrophenol	7.7
			Acetophenone	2-Hydroxyacetophenone	7.7
				Phenylglyoxal	7.7
			Benzyl Alcohol	Benzaldehyde	7.7
