# Supplementary material for: Ammonia monooxygenase: a work in progress
Source: Royal Society of Chemistry journal article supplement (doi:10.1039/d6sc01048b), 2026-04-08
Supplement: d6sc01048b3.xlsx [file d6sc01048b3.xlsx]

## Sheet: Inhibitors
	Organism	AMO Source	Inhibitor	Type of Inhibitor	Conc. used	pH	Temp (°C)	KI		Notes
	N. europaea	Whole cell assay	Allylthiourea	Specific	10-6 M	7.5	RT				Hooper, Terry, 1972
			KCN	Specific	5x10-6 M	7.5	RT
			Diethyldithiocarbamate	Specific	10-5 M	7.5	RT
			8-Quinolinol	Specific	10-5 M	7.5	RT
			o-Phenanthroline	Specific	5x10-5 M	7.5	RT
			ααʹ-Dipyridyl	Specific	10-4 M	7.5	RT
			Na2S	Nonspecific	10-4 M	7.5	RT
			Dithiol	Nonspecific	10-3 M	7.5	RT
			Methanol, Ethanol	Specific	5x10-3 M	7.5	RT
			Methylamine	Specific	0.01 M	7.5	RT
			Ethanol	Specific	0.09 M	7.5	RT
			n-propanol	Specific	0.33 M	7.5	RT
			i-propanol	Specific	0.13 M	7.5	RT
			n-butanol	Specific	0.11 M	7.5	RT
			t-butanol	Specific	0.11 M	7.5	RT
			Ethyl Acetate	Specific	0.23 M	7.5	RT
			Aminoethanol	Specific	0.2 M	7.5	RT
			Acetone	Nonspecific	0.14 M	7.5	RT
			Polymyxin B	Nonspecific	10-4 U/mL	7.5	RT			Caused cell lysis
			Acetaldehyde	Non-Inhibitory	10-2 M	7.5	RT
			Formate	Non-Inhibitory	0.1	7.5	RT
			Glyoxylate	Non-Inhibitory	0.1	7.5	RT
			Cholate	Non-Inhibitory	0.01	7.5	RT
			Glycerol	Non-Inhibitory	1.6	7.5	RT
			Dimethylsulfoxide	Non-Inhibitory	0.13	7.5	RT
			Acetate	Non-Inhibitory	0.1	7.5	RT
			Tris(hydroxymethyl)aminomethane	Non-Inhibitory	0.25	7.5	RT
	N. europaea	Whole cell assay	CH4	Competitive		7.5	25	50 μM			Suzuki, Dular. 1976
			CO	Competitive		7.5	25	3 μM
			Methanol	Competitive		7.5	25	0.12 μM
	N. europaea	Whole cell assay	Acetylene	Suicide Inhibitor	Saturated Soln.	7.7	30			Binds to A subunit. Requires O2.	Hyman, Wood. 1985
			Phenylacetylene	Specific	Varied	7.7	30			Binds to A subunit. Requires O2.
	N. europaea	Whole cell assay	CS2		100 μM	7.8					Hyman, Arp. 1990
	N. europaea	Whole cell assay	CS2		0.1 μM	8	30			Strong inhibitor, forms DMSO	Juliette, Arp. 1993
			Dimethylsulfide		0.5 μM	8	30			Weak inhibitor
			Dimethyldisulfide		0.5 μM	8	30			Weak inhibitor
			Ethanethiol		0.5 μM	8	30			Strong inhibitor
	N. europaea	Whole cell assay	Methane	Competitive		7.7	30	3240 μM		Second value by alternative method	Keener, Arp. 1993
			Ethane	Noncompetitive		7.7	30	220 μM	890 μM	Second value by alternative method
			Propane	Noncompetitive		7.7	30	1430 μM	440 μM	Second value by alternative method
			n-Butane	Noncompetitive		7.7	30	920 μM	300 μM	Second value by alternative method
			Ethylene	Competitive		7.7	30	660 μM		Second value by alternative method
			Chloromethane	Noncompetitive		7.7	30	300 μM	1470 μM	Second value by alternative method
			Chloroethane	Noncompetitive		7.7	30	1410 μM	1420 μM	Second value by alternative method
			n-Chloropropane	Noncompetitive		7.7	30	5150 μM	1010 μM	Second value by alternative method
			Bromomethane	Noncompetitive		7.7	30	500 μM	1490 μM	Second value by alternative method
			Bromoethane	Noncompetitive		7.7	30	490 μM	220 μM	Second value by alternative method
			Iodomethane	Noncompetitive		7.7	30	130 μM	30 μM	Second value by alternative method
			Iodoethane	Noncompetitive		7.7	30	290 μM	30 μM	Second value by alternative method
	N. europaea	Whole cell assay	1-Hexyne		27 μM	7.7					Keener, Arp. 1998
			3-Hexyne		27 μM, 54 μM	7.7
			p-Anisidine		250 μM	7.7
			1,3-Phenylenediammine		62 μM, 125 μM	7.7
			Cyclopropyl Bromide		31 μM	7.7
			1,2-Dimethylcyclopropane		250 μM	7.7
			Acetylene		20 μM	7.7
	N. europaea	Whole cell assay	Nitrite			5.5 to 8.0					Stein, Arp. 1998
	N. europaea	Whole cell assay	Methylbromide		.11 to .44 mM	6.2, 7.2, 8.2				Observed oxidation of MeBr	Duddleston, Arp. 2000
	N. europaea	Whole cell assay	Acetylene			7.3	28			Propose C2H2 is oxidized to ketene	Gilch, Schmidt. 2009
	N. gargensis	Whole cell assay	C2-C5 1-alkynes								Taylor, Bottomley. 2015
	N. viennensis	Whole cell assay	C2-C5 1-alkynes
	N. europaea	Whole cell assay	C2-C8 1-alkynes	Noncompetitive		7.7	30				Wright, Lehtovirta-Morley. 2020
			Phenylacetylene			7.7	30
	Ca. Nitrosocosmicus franklandus	Whole cell assay	C2-C5 1-alkynes			7.5	37
			Phenylacetylene			7.5	37			10x less inhibition than N. europaea
	Ca. Nitrosotalea sinensis	Whole cell assay	C2-C5 1-alkynes			5.3	37			Stronger inhibition than N. franklandus
			1-Hexyne			5.3	37			Did not effect N. franklandus
	N. europaea	Whole cell assay	C1-C3 alcohols	Specific							Oudova-Rivera, Lehtovirta-Morley. 2023
			>C4 alcohols	Nonspecific
	Ca. N. franklandus C13	Whole cell assay	Methanol, Ethanol	Specific						Methanol is most potent
