# Supplementary material for: Ammonia monooxygenase: a work in progress
Source: Royal Society of Chemistry journal article supplement (doi:10.1039/d6sc01048b), 2026-04-08
Supplement: d6sc01048b4.xlsx [file d6sc01048b4.xlsx]

## Sheet: NH3 and NH4+
	Organism	Organism Type	AMO Source	Substrate	pH	Temp (°C)	KM	Vmax	Notes	Reference
	N. europaea	AOB	Whole cell assay	NH3	7.75	30	50 μM			Hyman, Wood. 1983.
				NH4+	7.75	30	1.2 mM
	N. europaea	AOB	Whole cell assay	NH4+	7.7	30	1.32 + 0.22 mM	1.68 + 0.15 μmol min-1 mg protein-1		Keener, Arp. 1993
	N. maritimus SCM1	AOA	Whole cell assay	NH3/NH4+	7.5	30	0.134 μM	29.82 μmol N hr-1 mg protein-1	Observed by ammonium uptake	Martens-Habbena, Stahl. 2009
				NH3/NH4+	7.5	30	0.134 μM	23.77 μmol N hr-1 mg protein-1	Observed by oxygen uptake
	Nitrospira inopinata	AOB	Whole cell assay	NH3/NH4+			0.65 + 0.12 μM total N	12.8 μmol N hr-1 mg protein-1	N. inoptina is a comammox bacteria	Kits, Wagner. 2017
	Nitrososphaera gargensis	AOA	Whole cell assay	NH3/NH4+			5.6 + 0.9 μM total N	28.7 μmol N hr-1 mg protein-1
	Nitrososphaera viennensis	AOA	Whole cell assay	NH3/NH4+			5.4 + 0.6 μM total N	36.0 μmol N hr-1 mg protein-1
	Ca. Nitrosotenus uzonensis	AOA	Whole cell assay	NH3/NH4+			43.7 + 7.6 μM total N	26.2 μmol N hr-1 mg protein-1
	Ca. Nitrosacidococcus tergens' sp. RJ19	AOB	Whole cell assay	NH3/NH4+	4.7		5.2 + 0.5 mM total N	0.28 μM O2 min-1 μg protein-1	16.8 μM O2 hr-1 μg protein-1	Picone, Op den Camp. 2020
	‘Ca. Nitrosocosmicus oleophilus’ MY3b	AOA	Whole cell assay	NH3/NH4+	6.5	30	2516.87 + 647.78 μM total N	37.04 + 6.41 μmol N hr-1 mg protein-1		Wagner, 2021
				NH3/NH4+	7.2	30	818.73 + 185.44 μM total N	36.12 + 5.13 μmol N hr-1 mg protein-1
				NH3/NH4+	8.3	30	246.29 + 97.82 μM total N	35.84 + 5.01 μmol N hr-1 mg protein-1
				NH3/NH4+	7.2	25	879.23 + 10.98 μM total N	21.97 + 1.32 μmol N hr-1 mg protein-1
				NH3/NH4+	7.2	30	970 + 19 μM total N	35.11 + 0.11 μmol N hr-1 mg protein-1
				NH3/NH4+	7.2	35	832.42 + 15.01 μM total N	47.75 + 2.88 μmol N hr-1 mg protein-1
	N. inopinata	AOA	Whole cell assay	NH3/NH4+	6.7	37	2.24 + 0.53 μM total N	12.35 + 0.46 μmol N hr-1 mg protein-1
				NH3/NH4+	7.1	37	0.97 + 0.17 μM total N	14.77 + 1.35 μmol N hr-1 mg protein-1
				NH3/NH4+	7.8	37	0.39 + 0.09 μM total N	10.42 + 2.09 μmol N hr-1 mg protein-1
				NH3/NH4+	8.4	37	0.24 + 0.08 μM total N	10.56 + 0.85 μmol N hr-1 mg protein-1
	N. europaea	AOB	Whole cell assay	NH3/NH4+	7	25	4000	2300
				NH3/NH4+	7.5	25	16000	2900
				NH3/NH4+	8	25	480	2600
				NH3/NH4+	8.5	25	300	4600
				NH3/NH4+	9.1	25	140	5800
			Cell-free extract	NH3/NH4+	6.5	25	10000	18000
				NH3/NH4+	7	25	4000	23000
				NH3/NH4+	7.5	25	1300	24000
				NH3/NH4+	8	25	320	18000
	N. maritimus SCM1	AOA	Whole cell assay	NH3/NH4+	7.3	32	0.93 + 0.02 μM total N	8.13 + 0.16 μmol N hr-1 mg protein-1	Averaged from values on figures in SI.
	Nitrosopumilus piranensis D3C	AOA	Whole cell assay	NH3/NH4+	7.3	30	0.93 + 0.16 μM total N	17.28 + 0.77 μmol N hr-1 mg protein-1	Averaged from values on figures in SI.
	Nitrosopumilus adriaticus NF5	AOA	Whole cell assay	NH3/NH4+	7.3	30	0.80 + 0.11 μM total N	19.10 + 0.66 μmol N hr-1 mg protein-1	Averaged from values on figures in SI.
	Nitrosarchaeum koreense MY1	AOA	Whole cell assay	NH3/NH4+	7	25	0.56 + 0.06 μM total N	53.89 + 0.67 μmol N hr-1 mg protein-1	Averaged from values on figures in SI.
	Ca. Nitrosotenuis chungbukensis' NY2	AOA	Whole cell assay	NH3/NH4+	7	30	0.80 + 0.17 μM total N	48.48 + 1.98 μmol N hr-1 mg protein-1	Averaged from values on figures in SI.
	Ca. Nitrosotenuis uzonensis' N4 (Pure culture)	AOA	Whole cell assay	NH3/NH4+	7.5	37	0.53 + 0.04 μM total N	53.46 + 0.51 μmol N hr-1 mg protein-1	Averaged from values on figures in SI.
	Ca. Nitrosotenuis uzonensis' N4 (Enriched culture)	AOA	Whole cell assay	NH3/NH4+	7.75	37	0.24 + 0.03μM total N	43.11 + 1.62 μmol N hr-1 mg protein-1	Averaged from values on figures in SI.
	Ca. Nitrosotalea devanaterra' Nd1	AOA	Whole cell assay	NH3/NH4+	5.3	30	5.24 + 0.76 μM total N	43.24 + 1.44 μmol N per mg protein per hr	Averaged from values on figures in SI.
	Ca. Nitrosotalea sinensis' Nd2	AOA	Whole cell assay	NH3/NH4+	5.3	35	9.37 + 1.34 μM total N	48.52 + 1.10 μmol N hr-1 mg protein-1	Averaged from values on figures in SI.
	Ca. Nitrososphaera nevadensis' GerE (Enriched)	AOA	Whole cell assay	NH3/NH4+	7.1	50	1.90 + 0.12 μM total N	221.41 + 2.21 μmol N hr-1 mg protein-1	Averaged from values on figures in SI.
	Ca. N. oleophilus' MY3	AOA	Whole cell assay	NH3/NH4+	7	30	0.82 + 0.12 μM total N	518.10 + 39.67 μmol N hr-1 mg protein-1	Averaged from values on figures in SI.
	Ca. Nitrosocosmicus franklandus' C13	AOA	Whole cell assay	NH3/NH4+	7.8	42	0.42 + 0.07 μM total N	16.54 + 0.79 μmol N hr-1 mg protein-1	Averaged from values on figures in SI.
	Ca. Nitrosofervidus tenchongensis' DRC1 (Enriched)	AOA	Whole cell assay	NH3/NH4+	7.1	72	4.18 + 1.33 μM total N	54.52 + 4.65 μmol N hr-1 mg protein-1	Averaged from values on figures in SI.
	Ca. Nitrosocaldus yellowstonensis' HL72 (Enriched)	AOA	Whole cell assay	NH3/NH4+	7.1	72	6.60 + 1.33 μM total N	75.89 + 3.43 μmol N hr-1 mg protein-1	Averaged from values on figures in SI.
